# Supplementary material for: Ferrocene-Based Porous Organic Polymer (FPOP): Synthesis, Characterization and an Electrochemical Study
Source: MDPI journal article supplement (doi:10.3390/electrochem3010011), 2022-02-27
Supplement: s1 [file s1]

Archive with 1 entries (1 files):
- electrochem-1608699-supplementary.pdf
